# Supplementary material
Source: PubMed Central journal article supplement (PMC10991877)

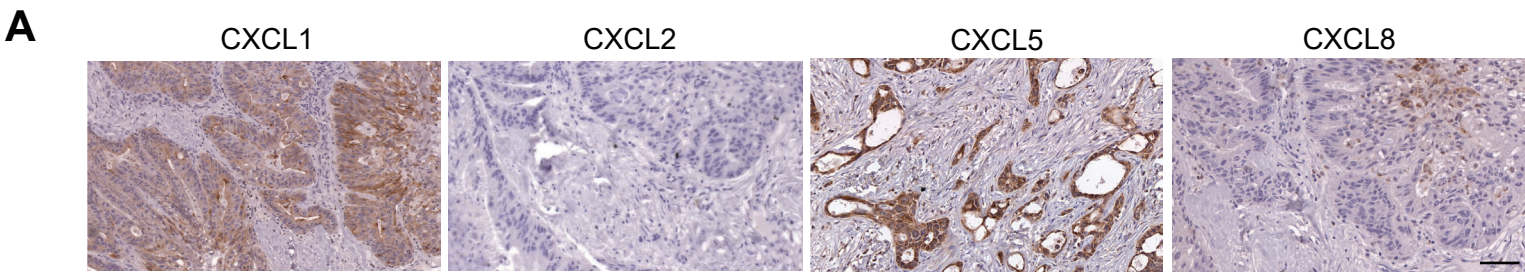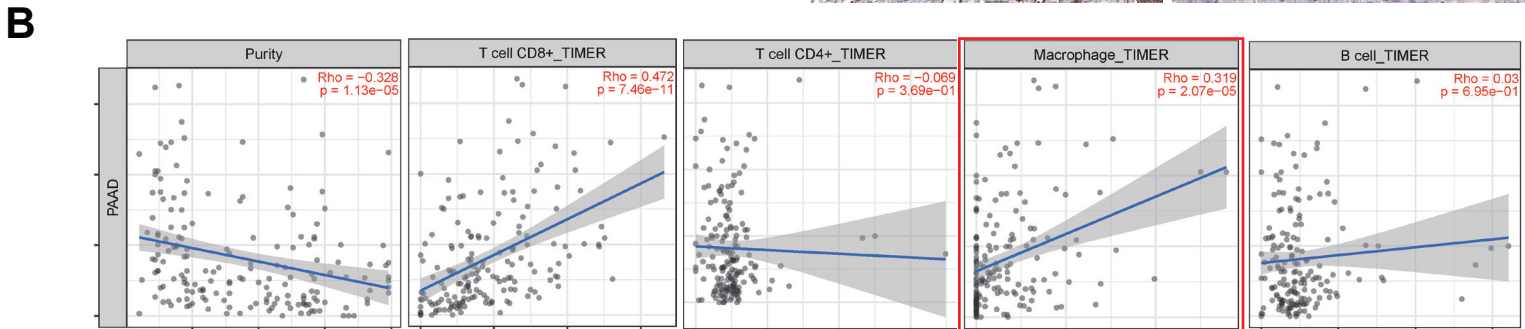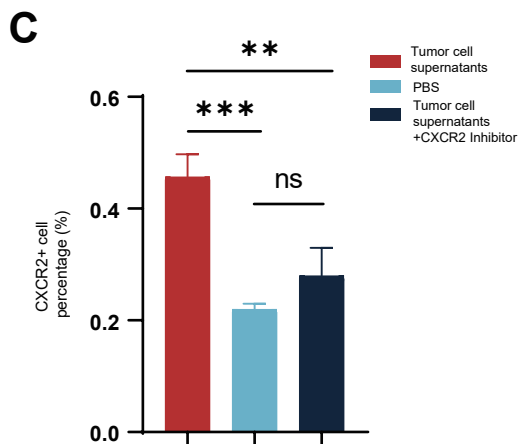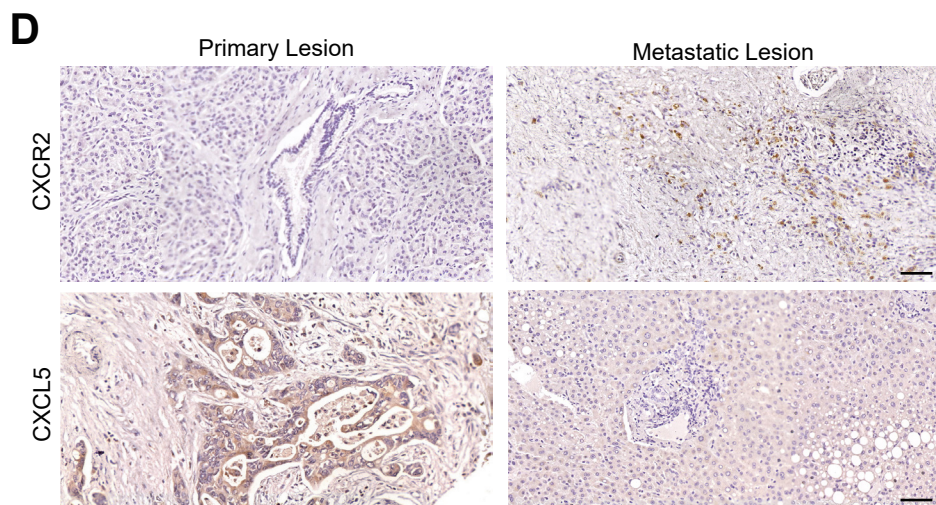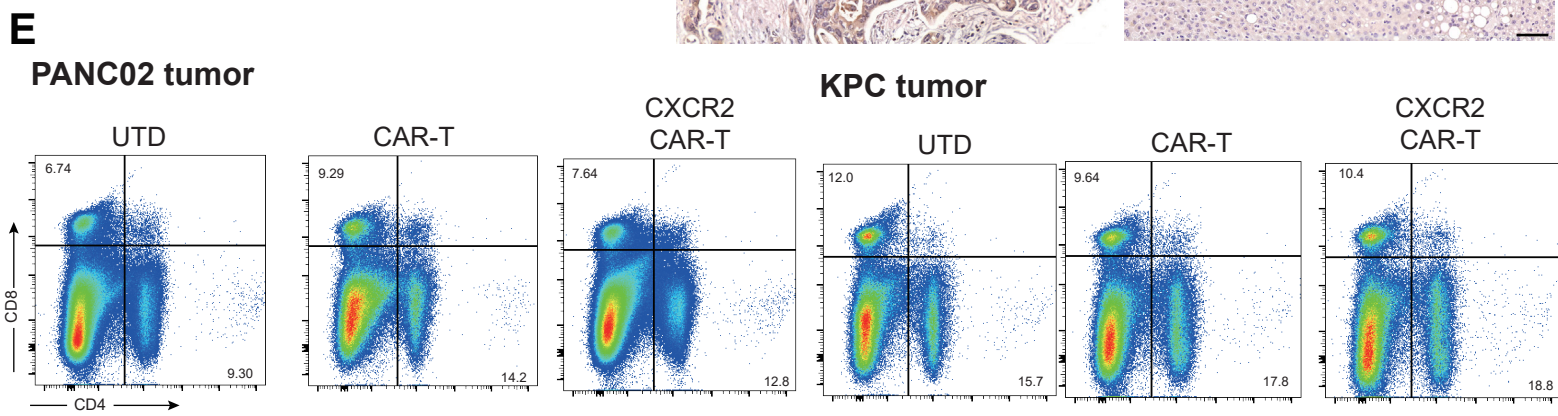

Supplement: 262_2024_3648_MOESM1_ESM.pdf [file 262_2024_3648_MOESM1_ESM.pdf]
